# Supplementary material for: Reduced H3K27me3 leads to abnormal Hox gene expression in neural tube defects
Source: PubMed Central journal article supplement (PMC6921514; doi:10.1186/s13072-019-0318-1), 2019-12-19

**Figure S1**

**A**

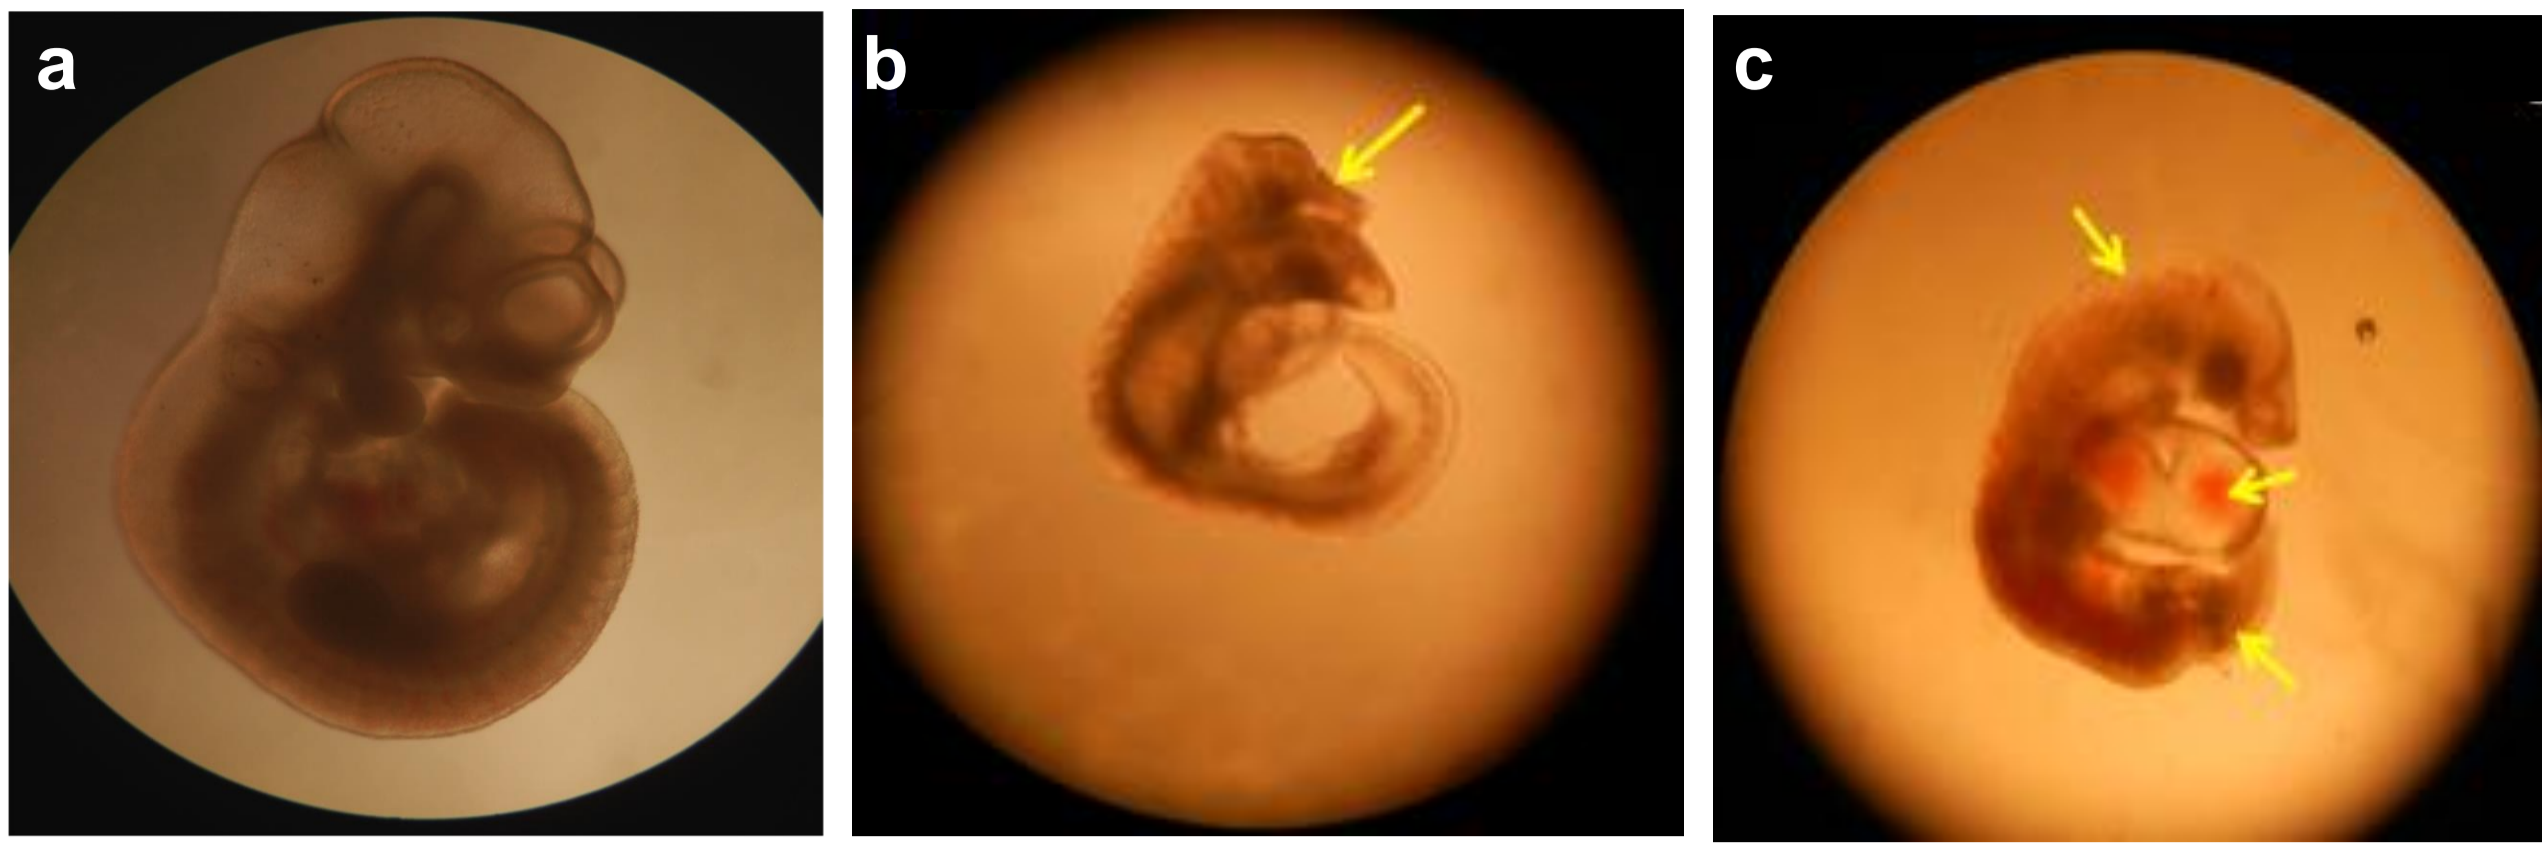

**B**

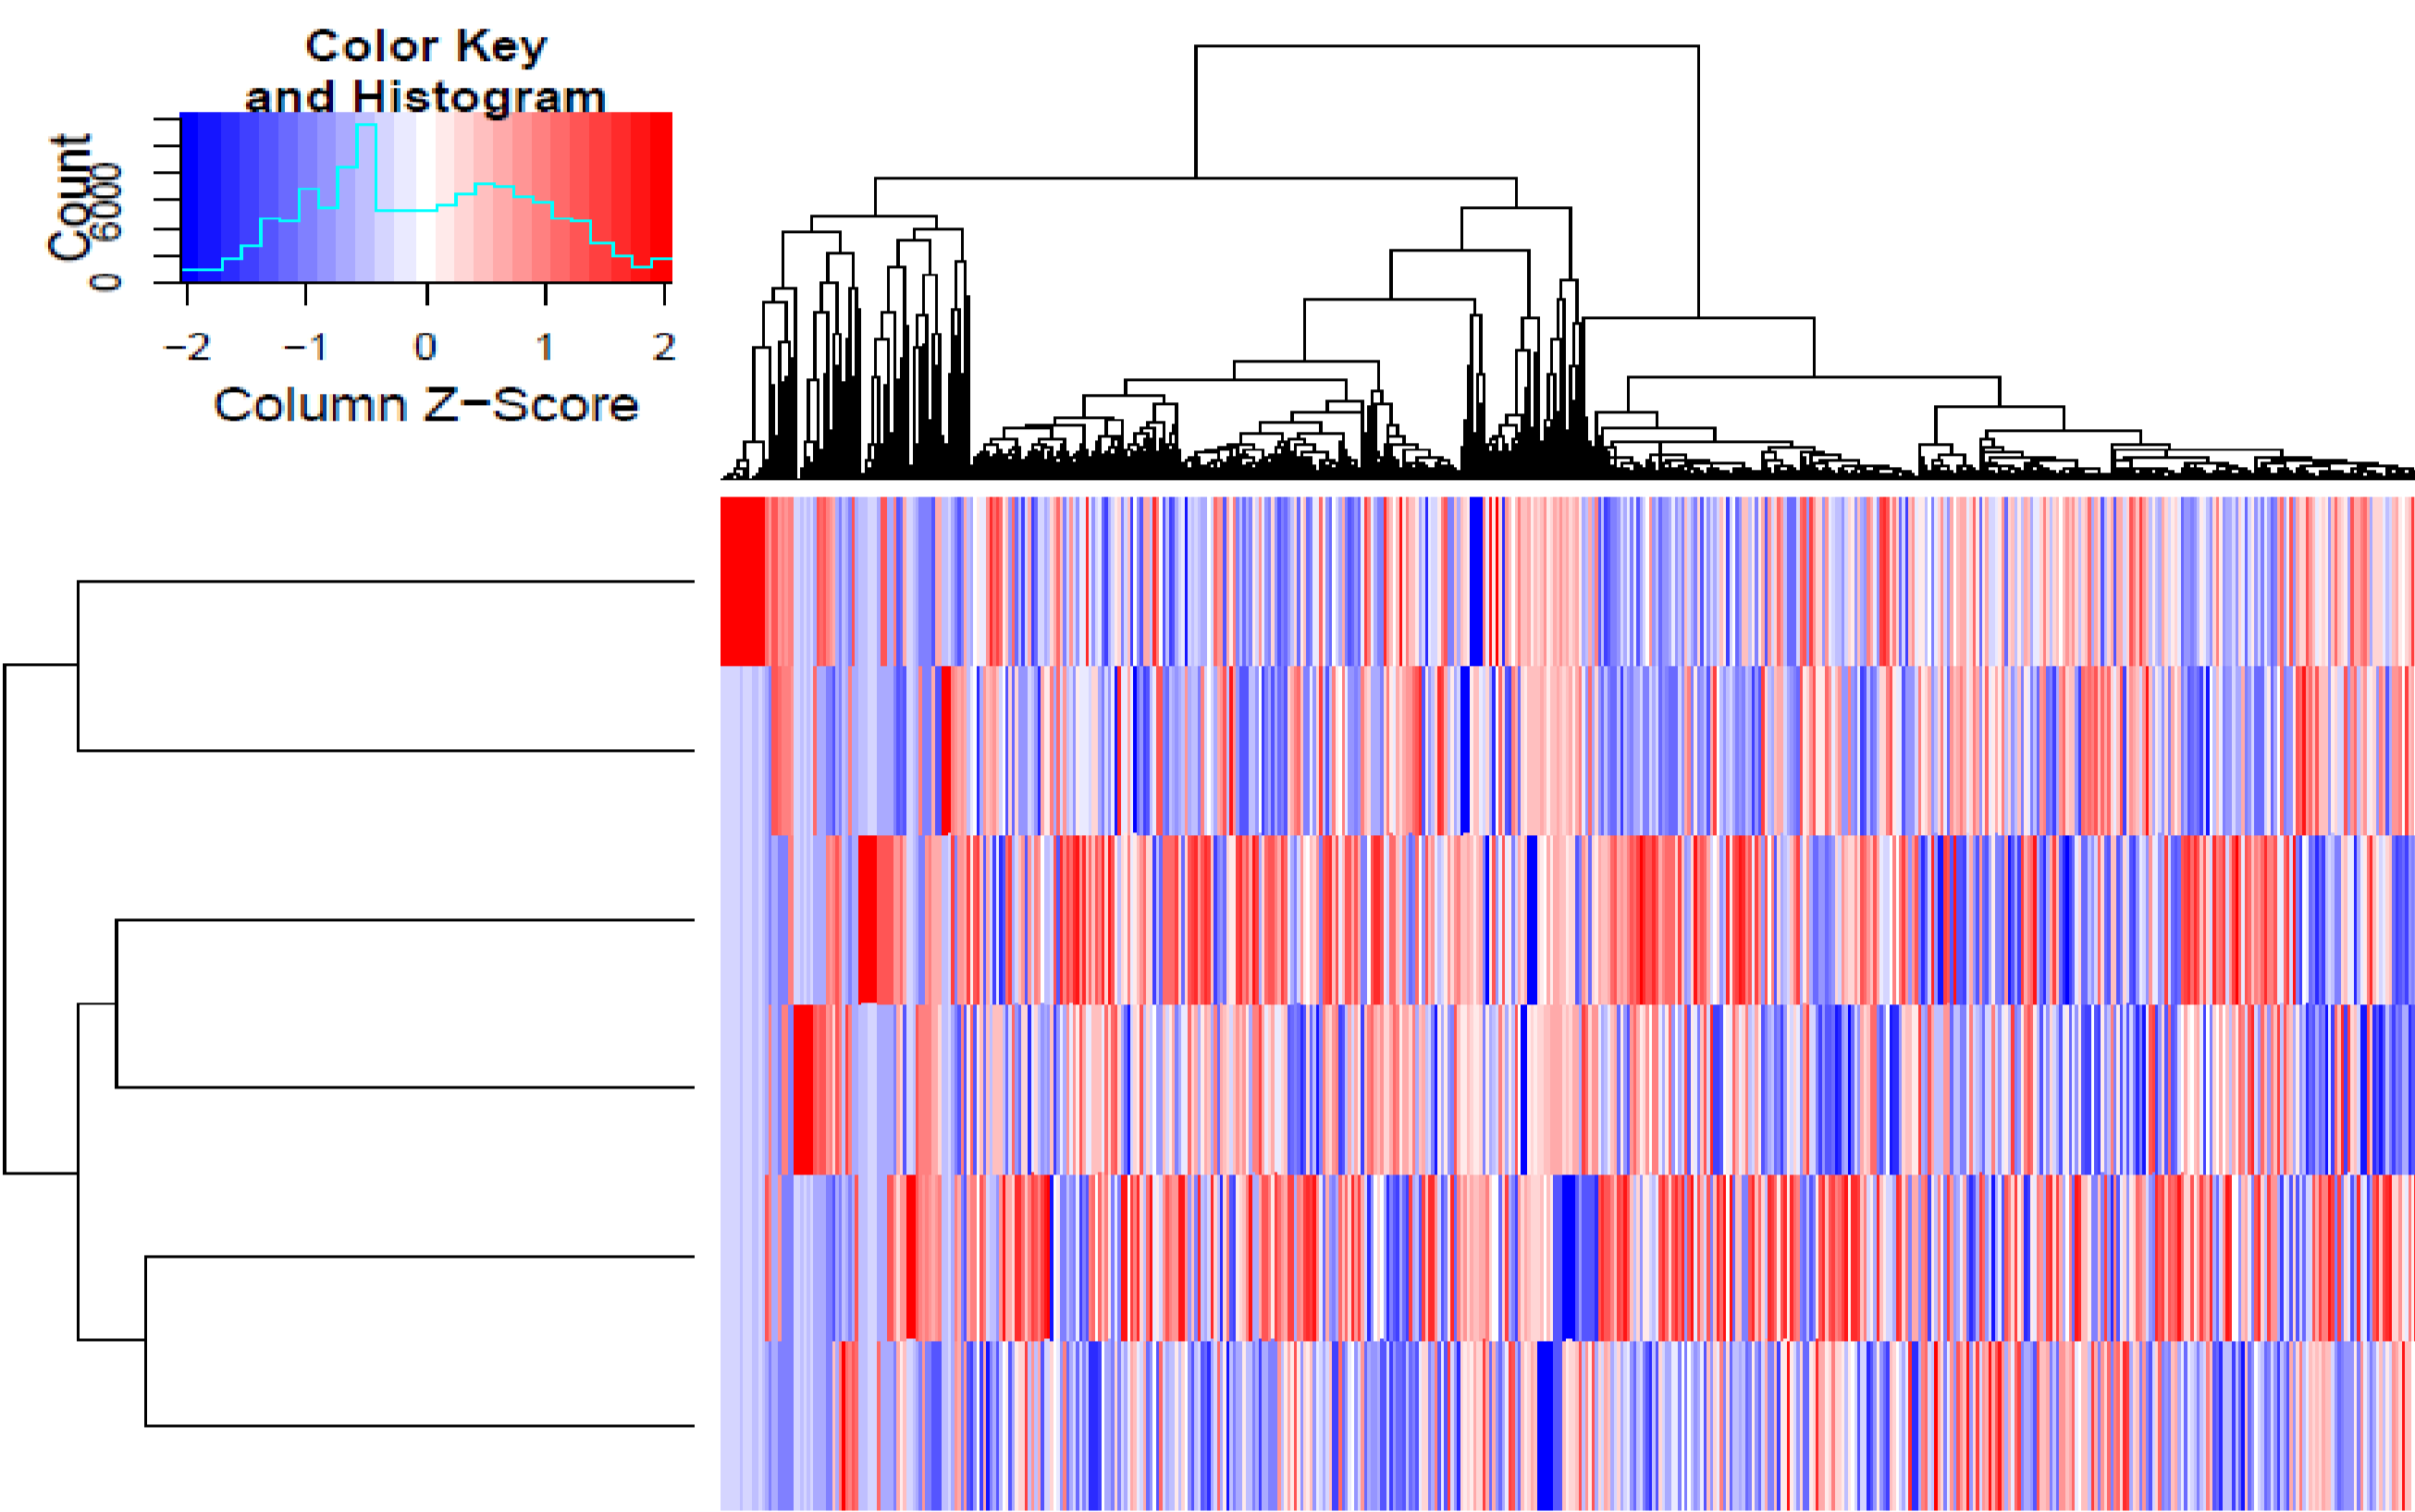

**D**

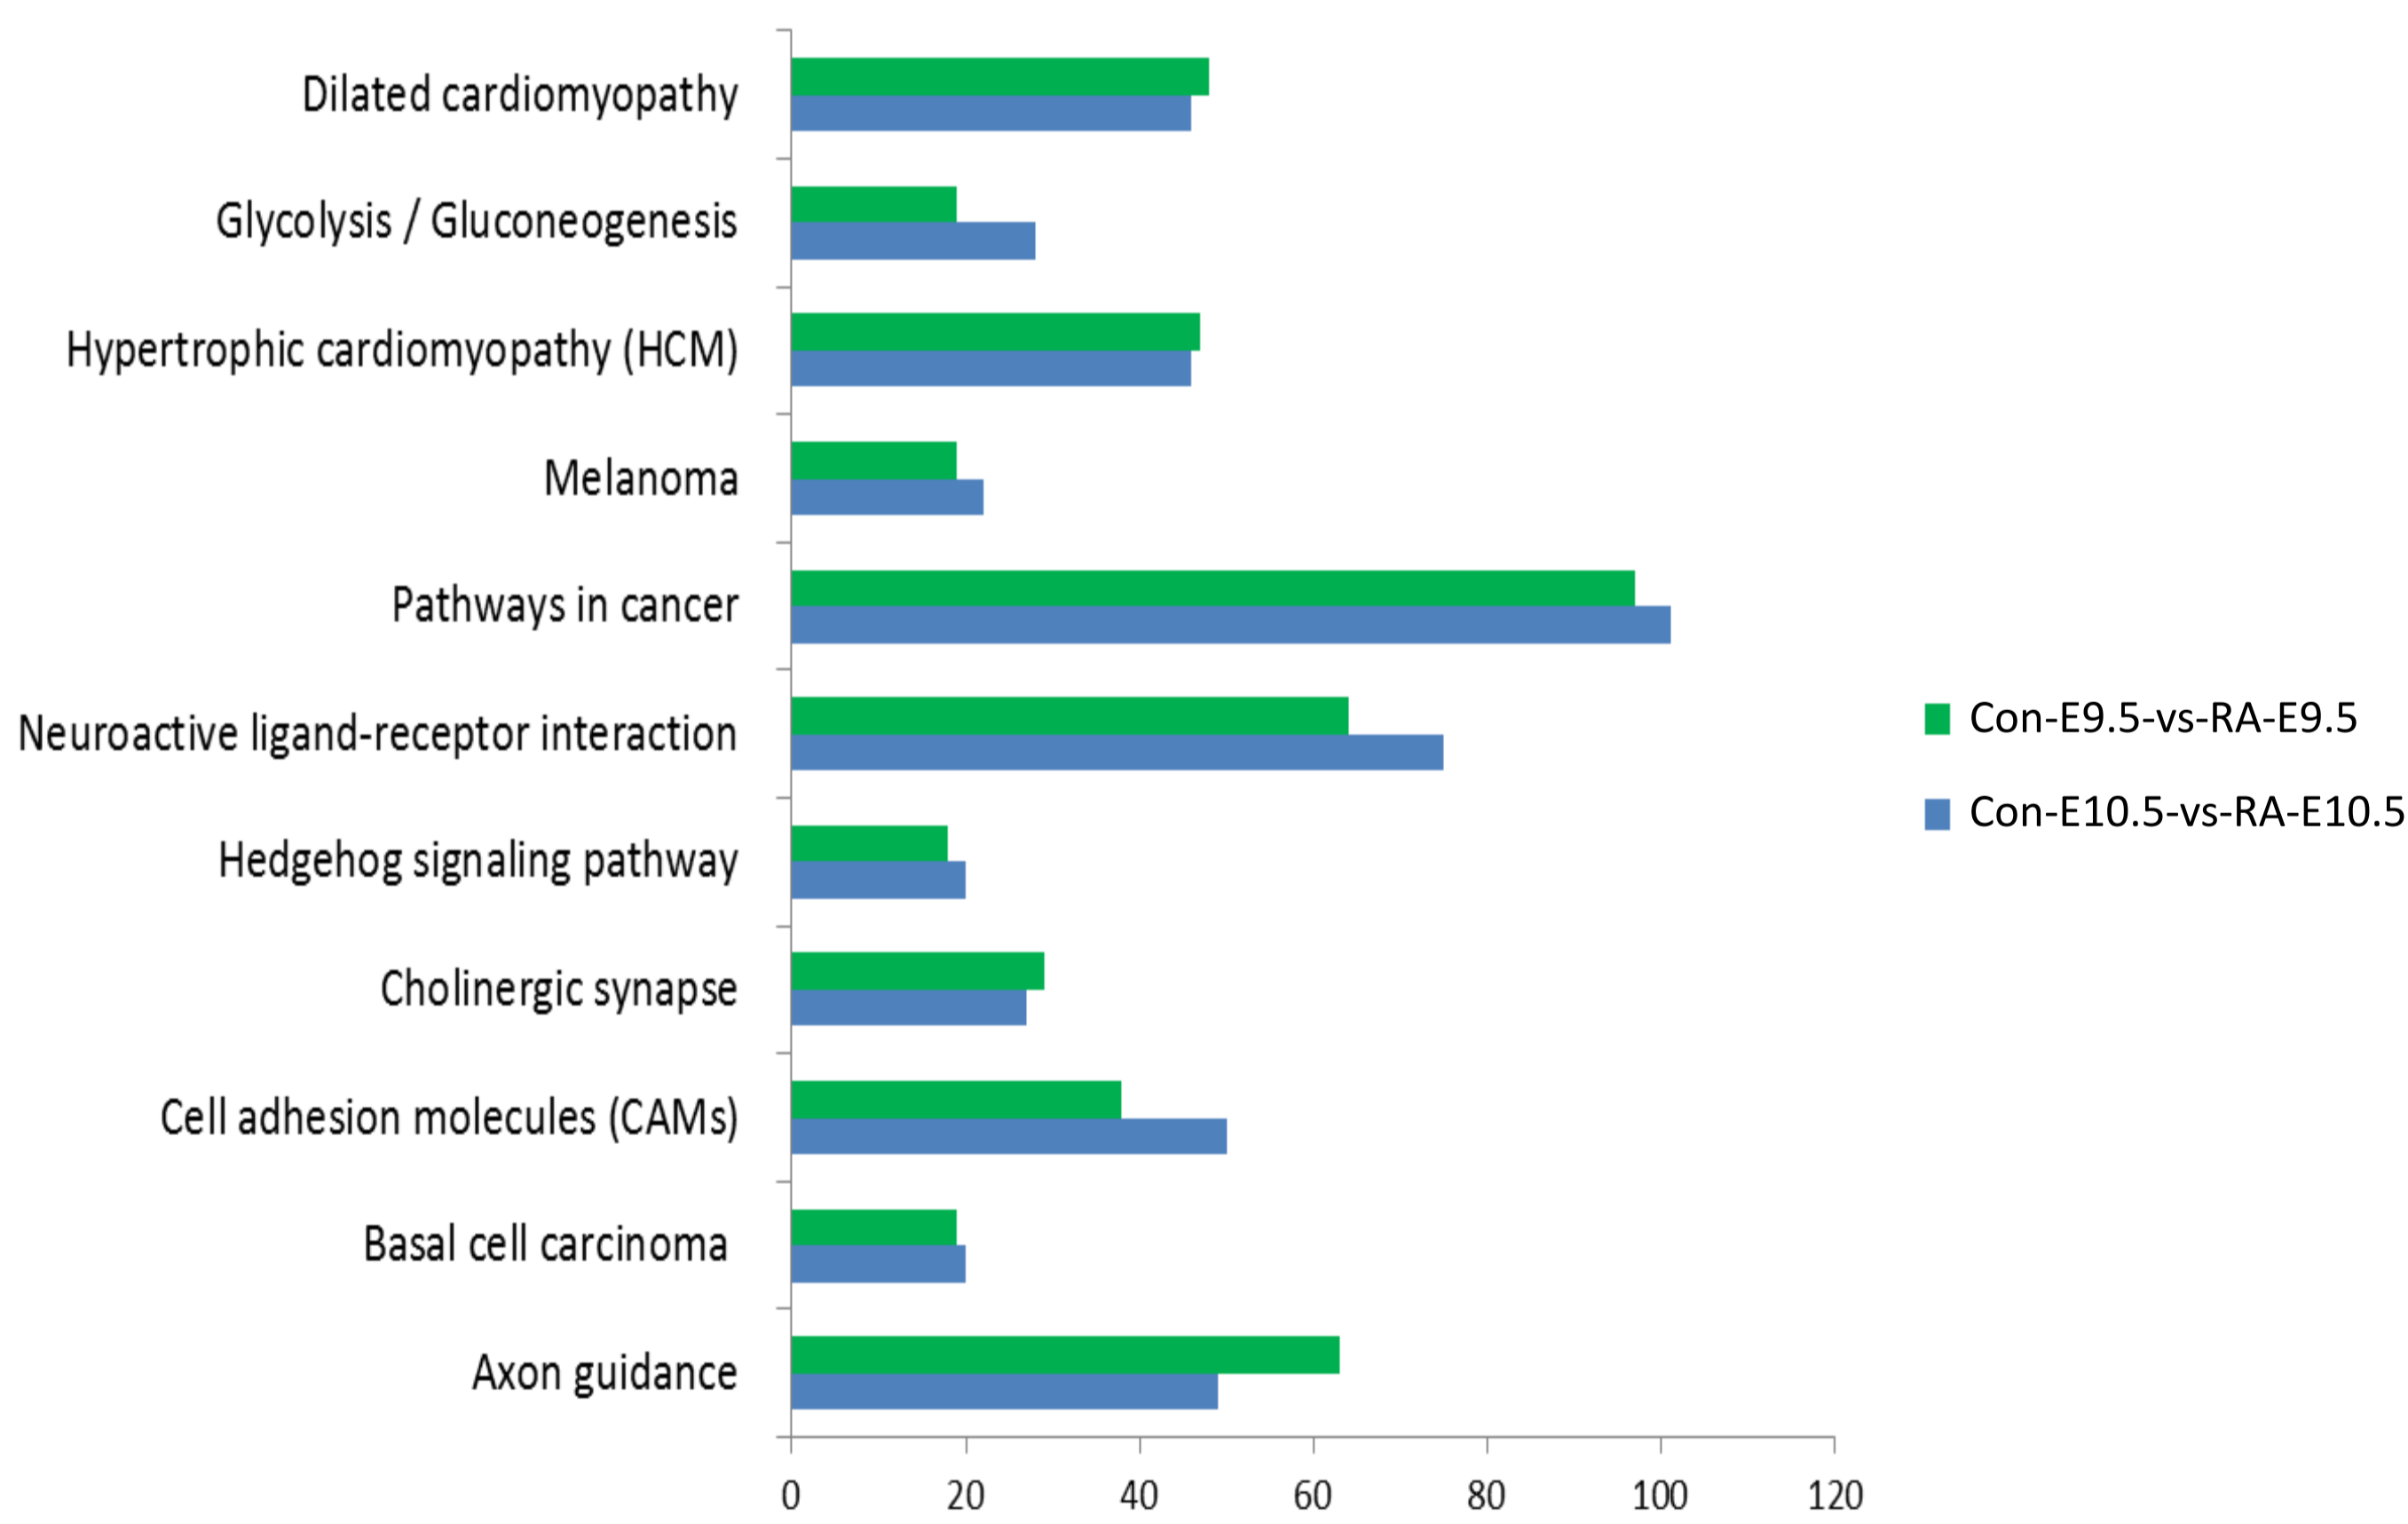

**C**

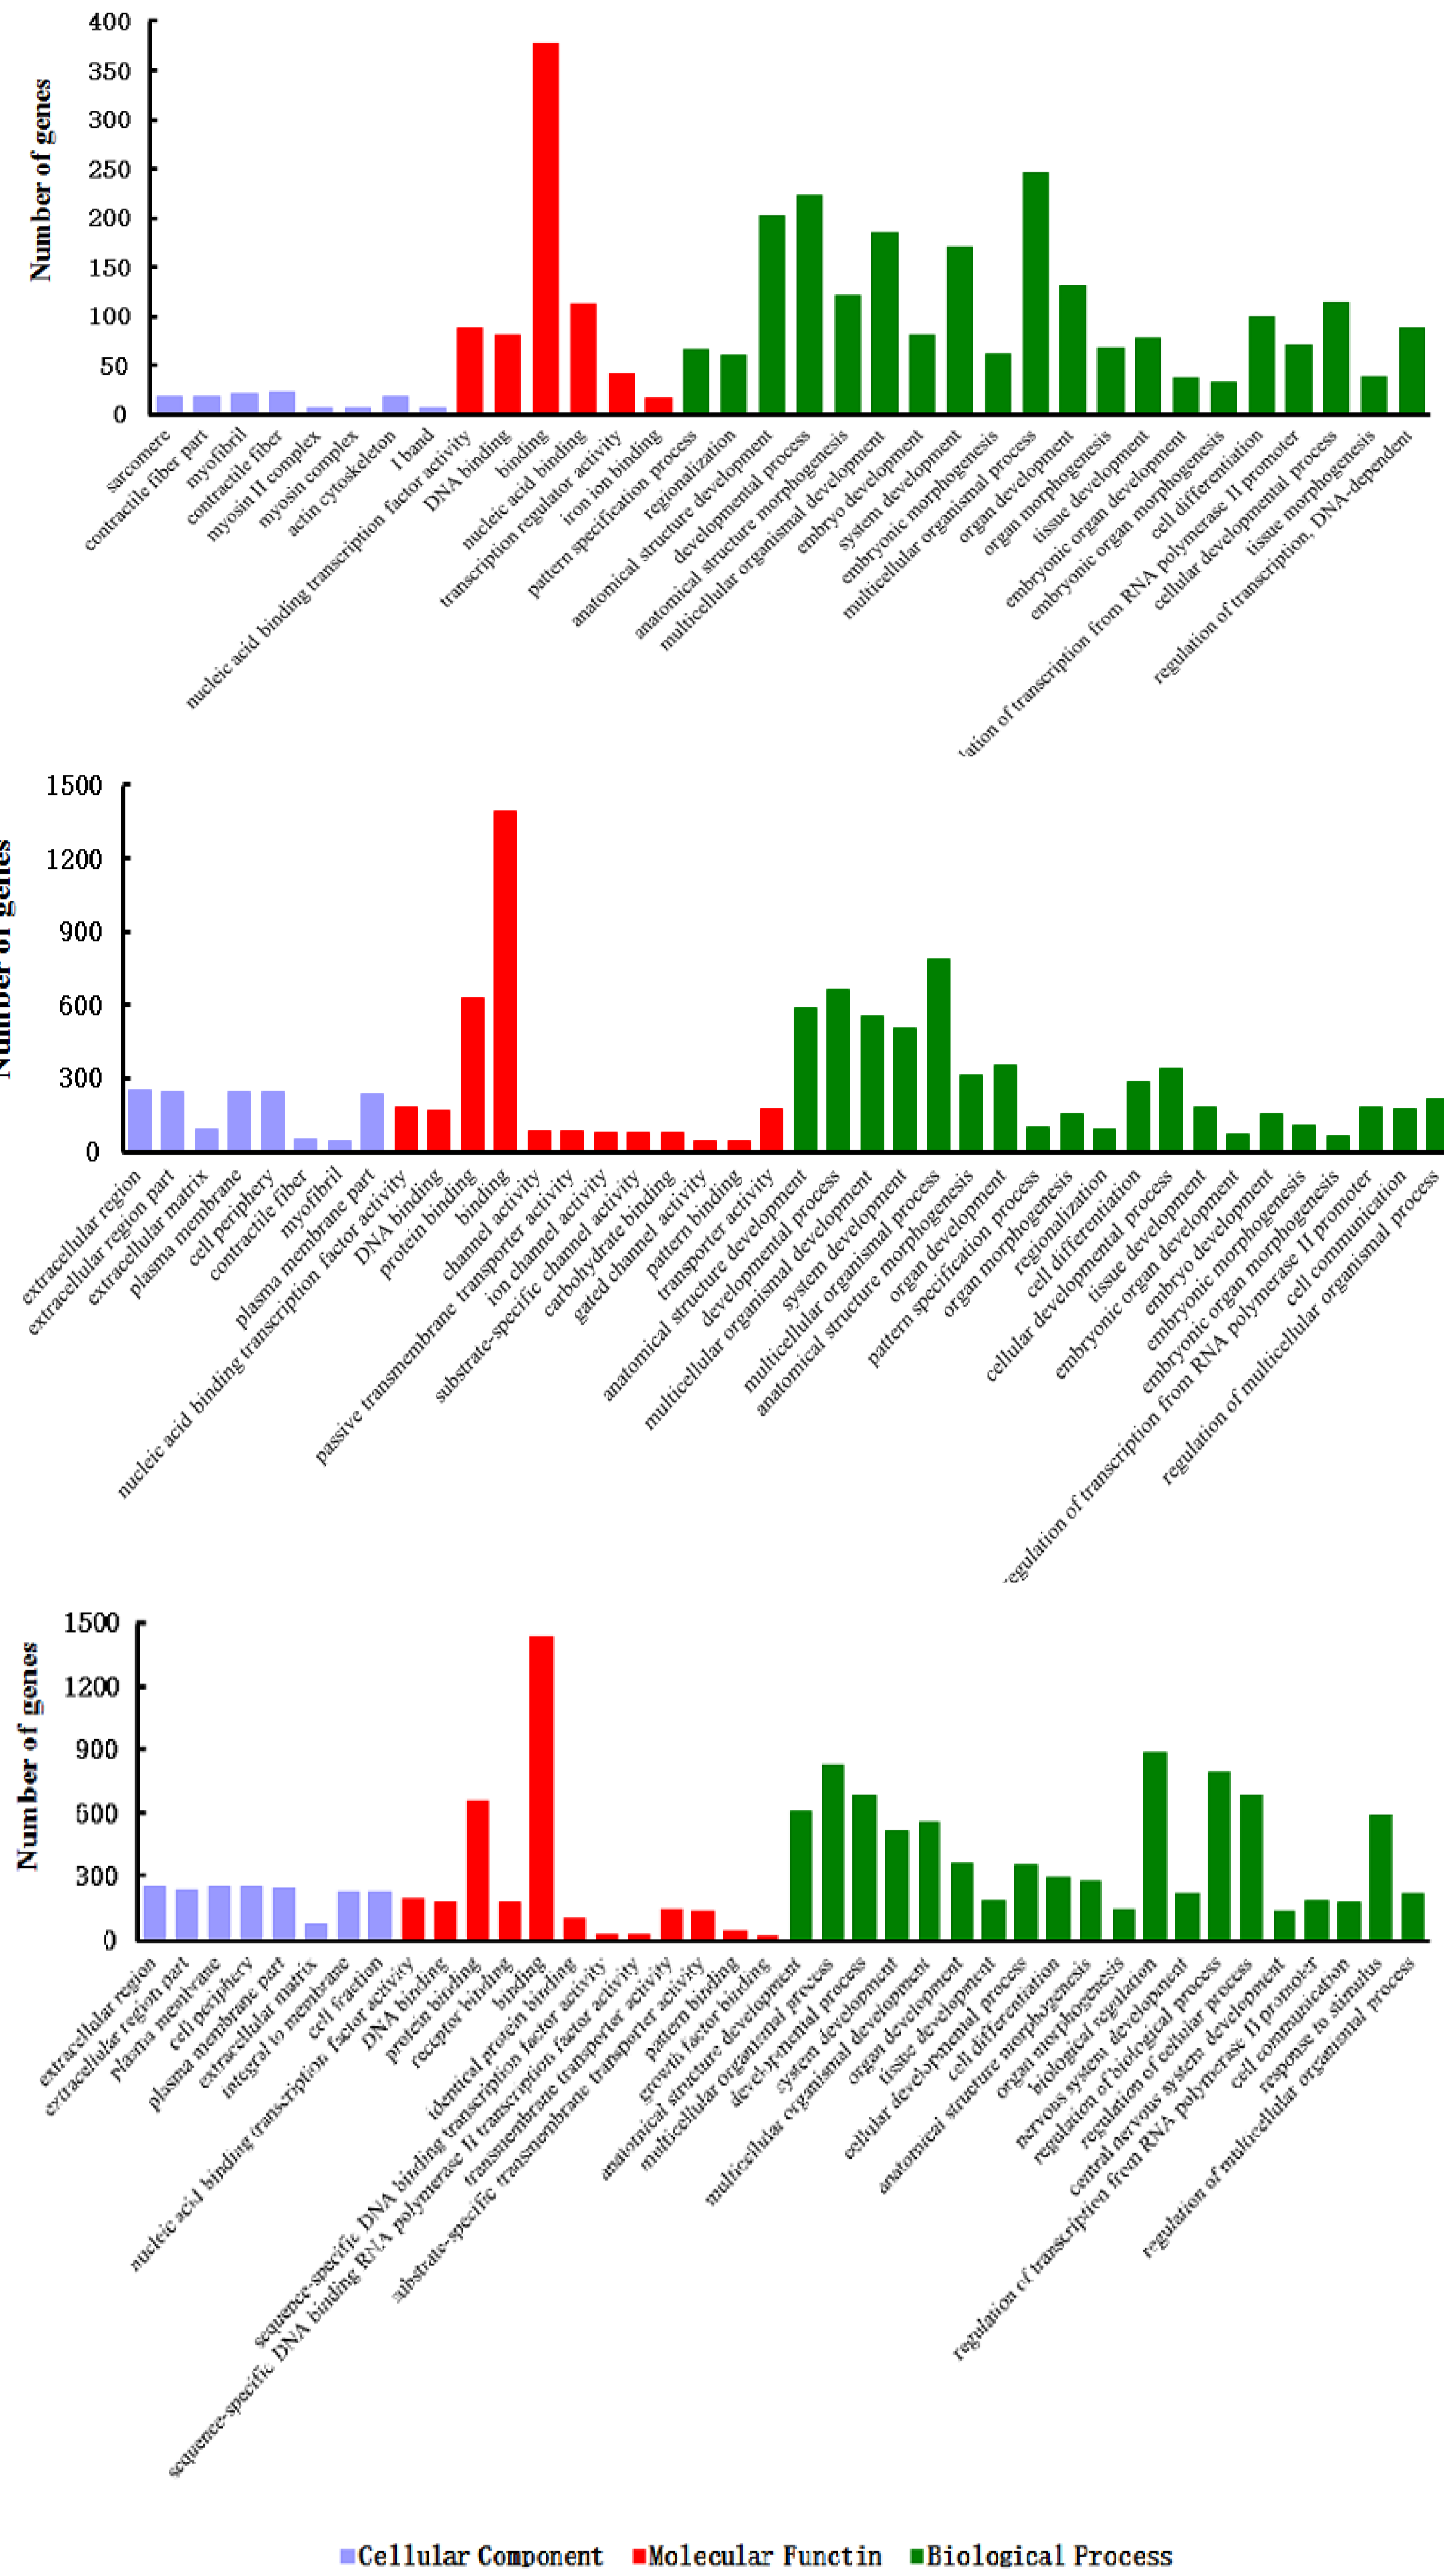

**E**

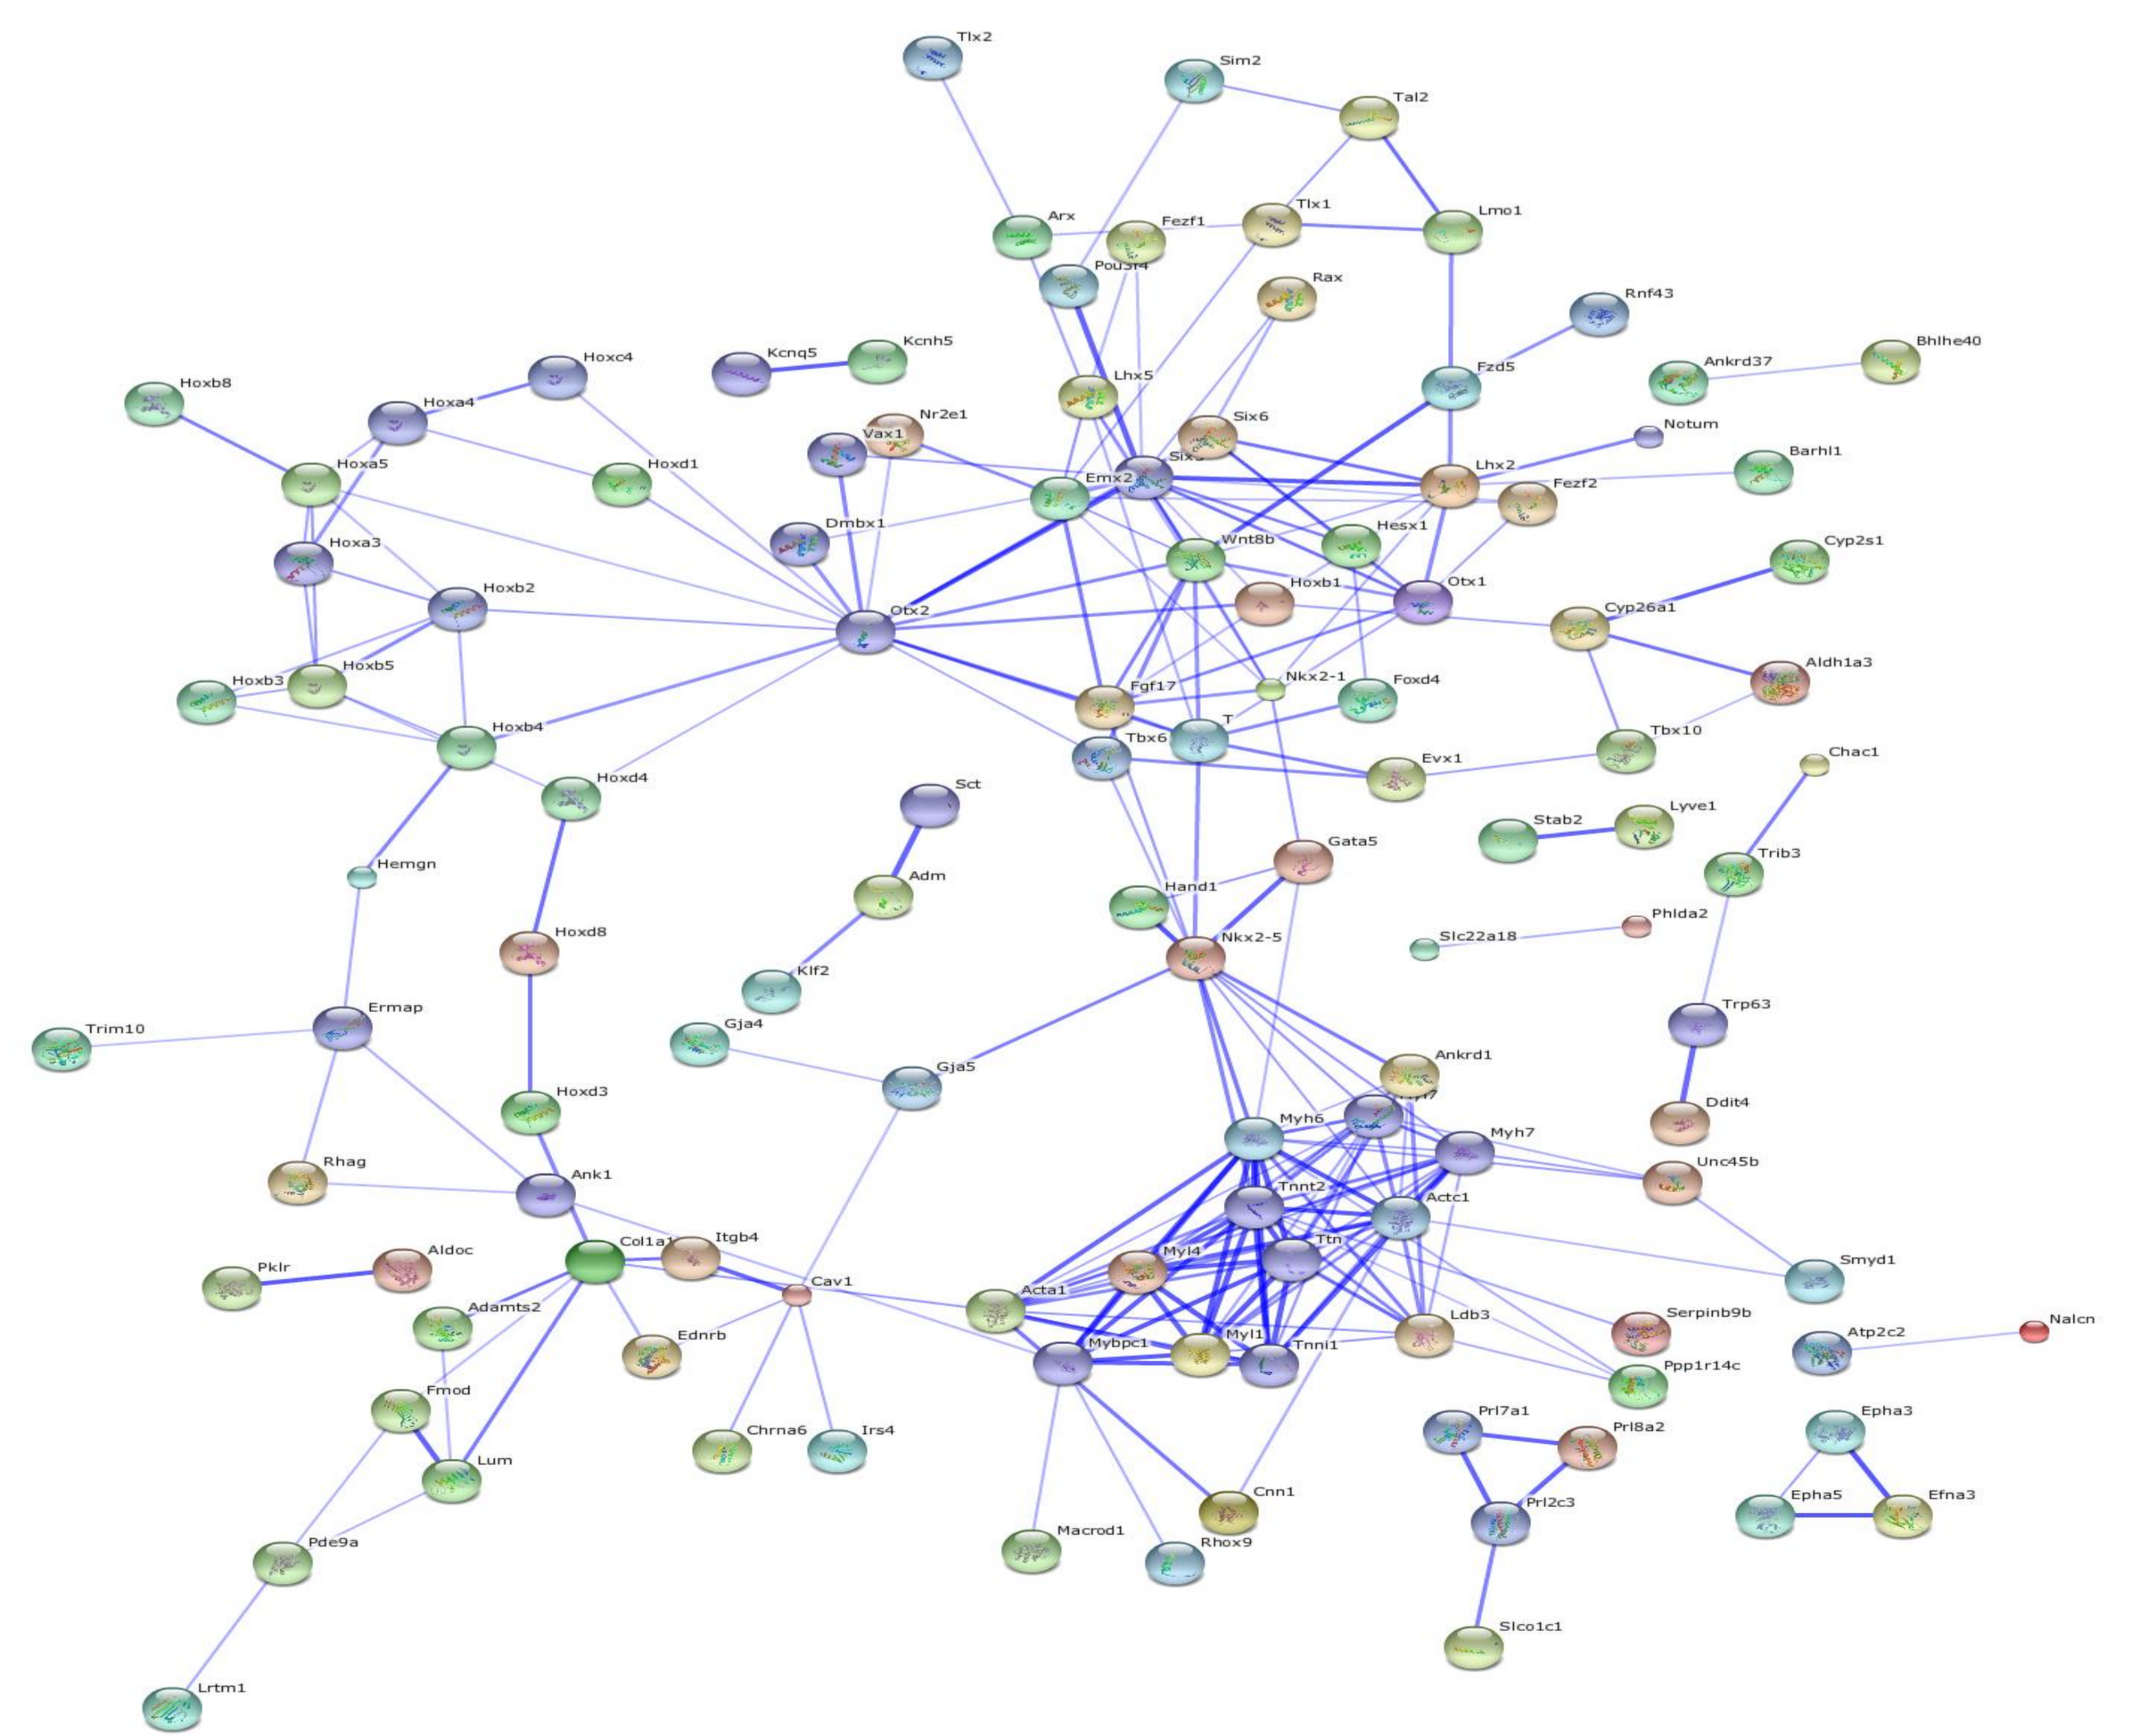

Supplement: 13072_2019_318_MOESM1_ESM.pdf [file 13072_2019_318_MOESM1_ESM.pdf]
