# Supplementary material for: Reduced H3K27me3 leads to abnormal Hox gene expression in neural tube defects
Source: PubMed Central journal article supplement (PMC6921514; doi:10.1186/s13072-019-0318-1), 2019-12-19

**Figure S4****A**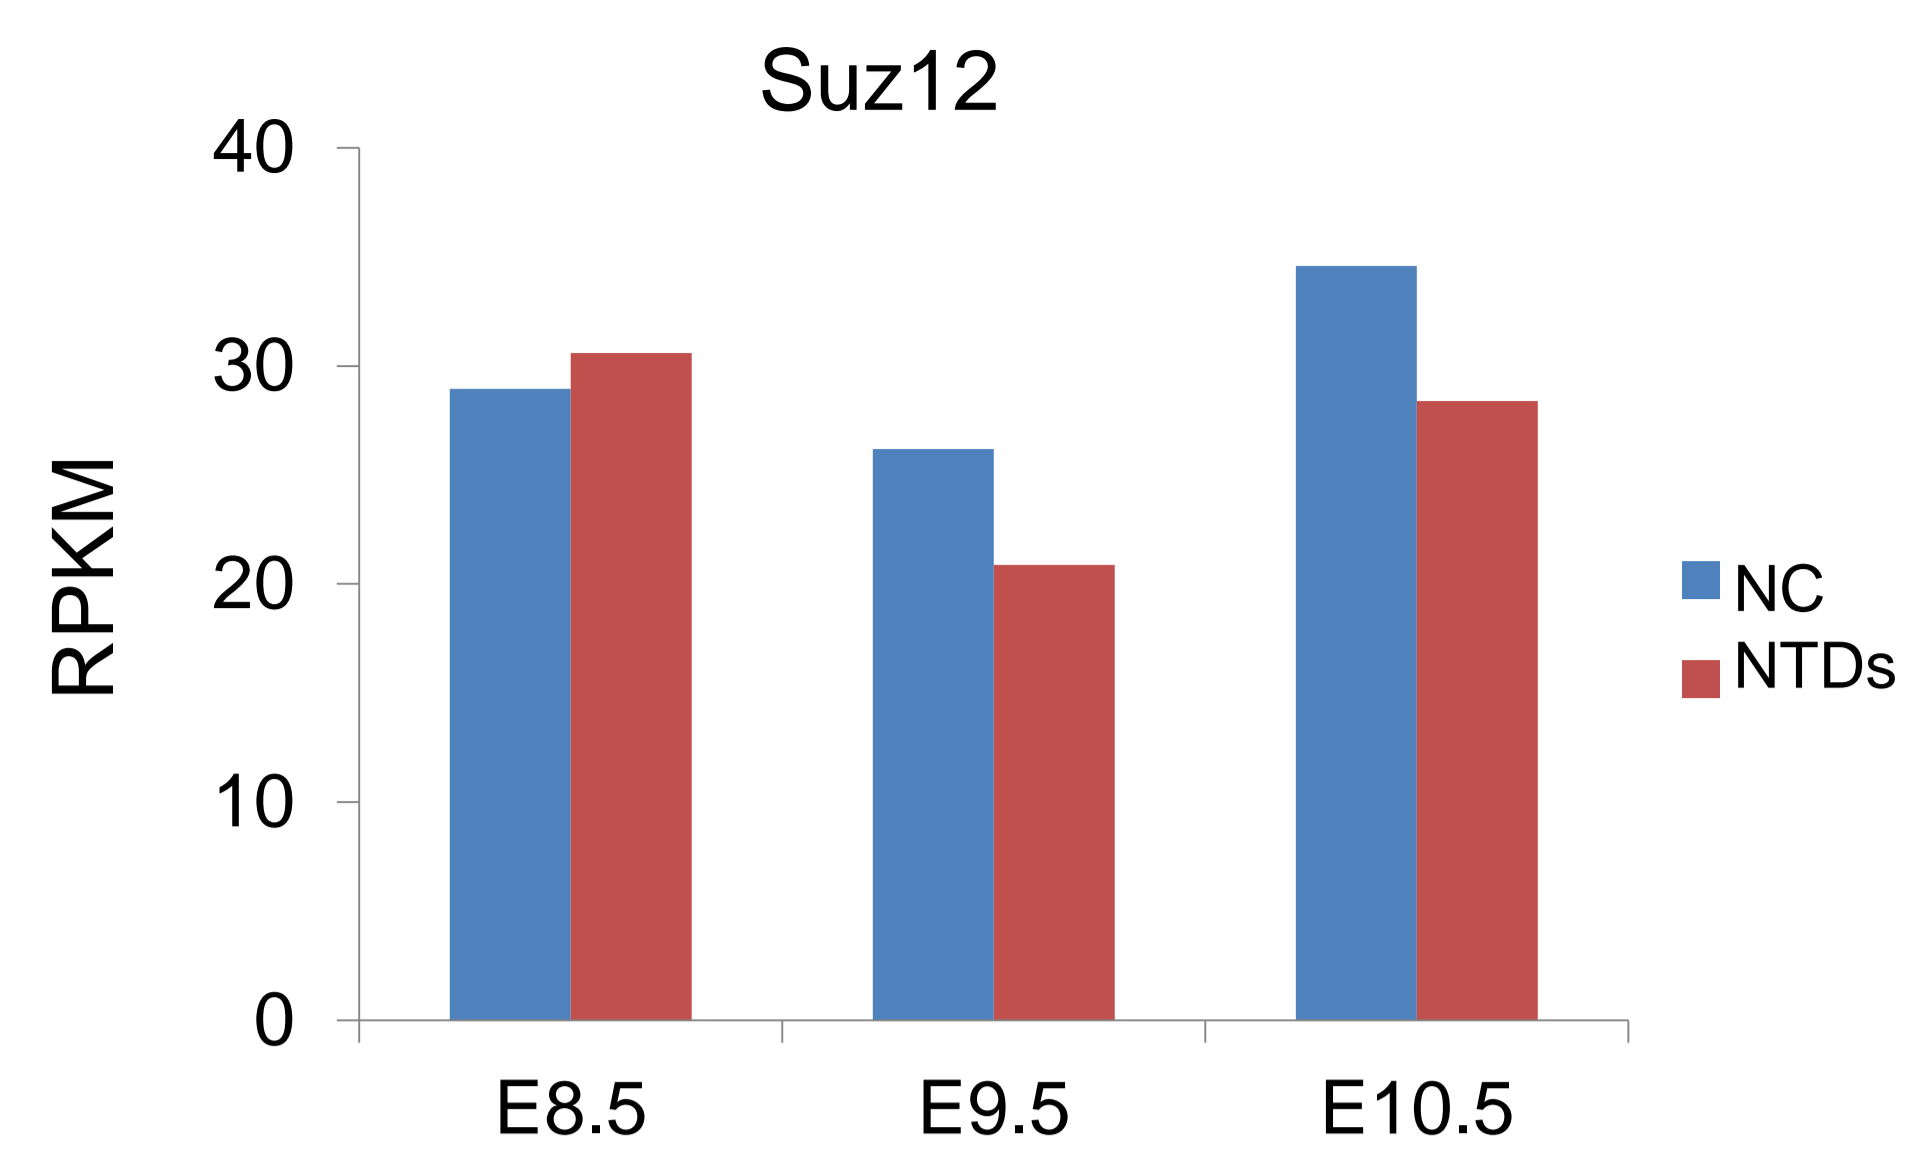**B**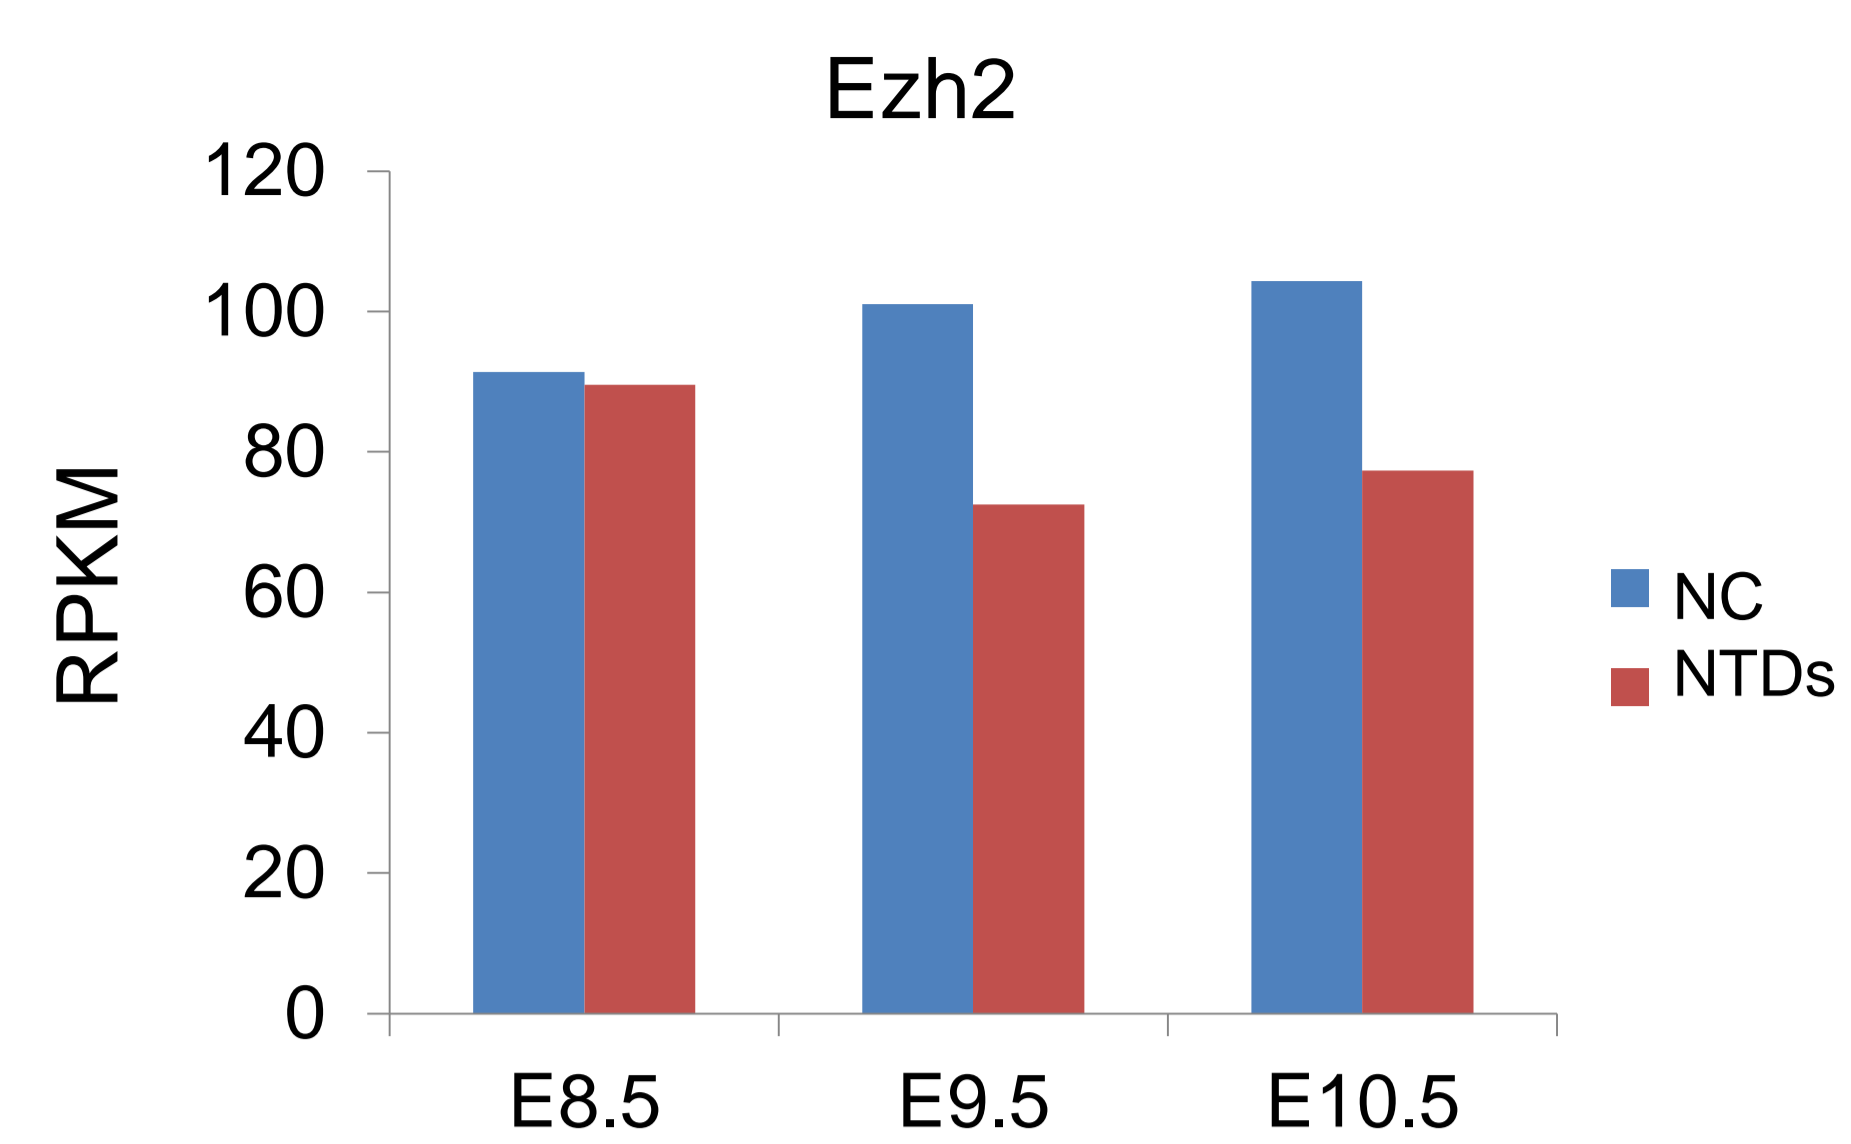**C**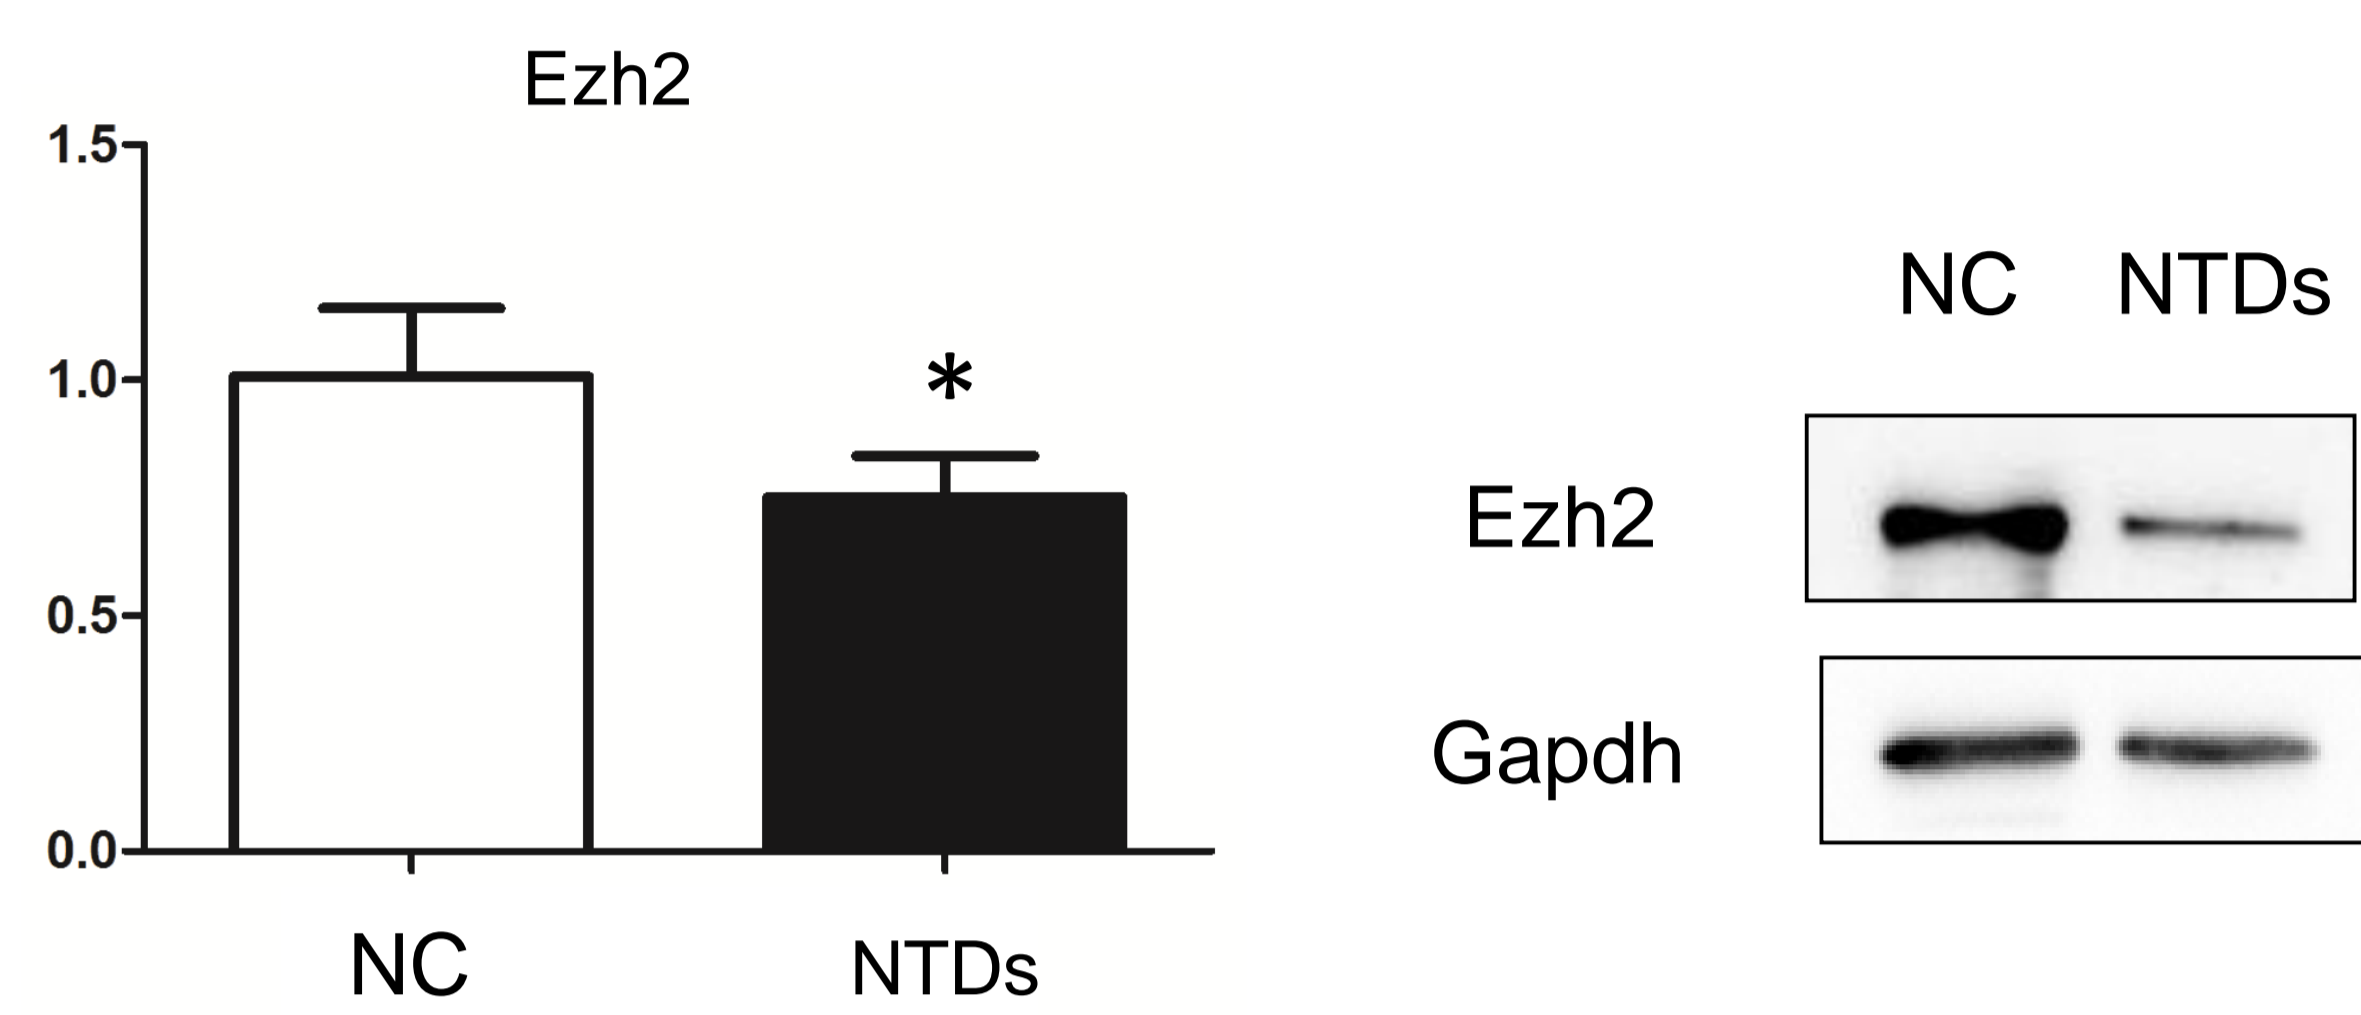**D**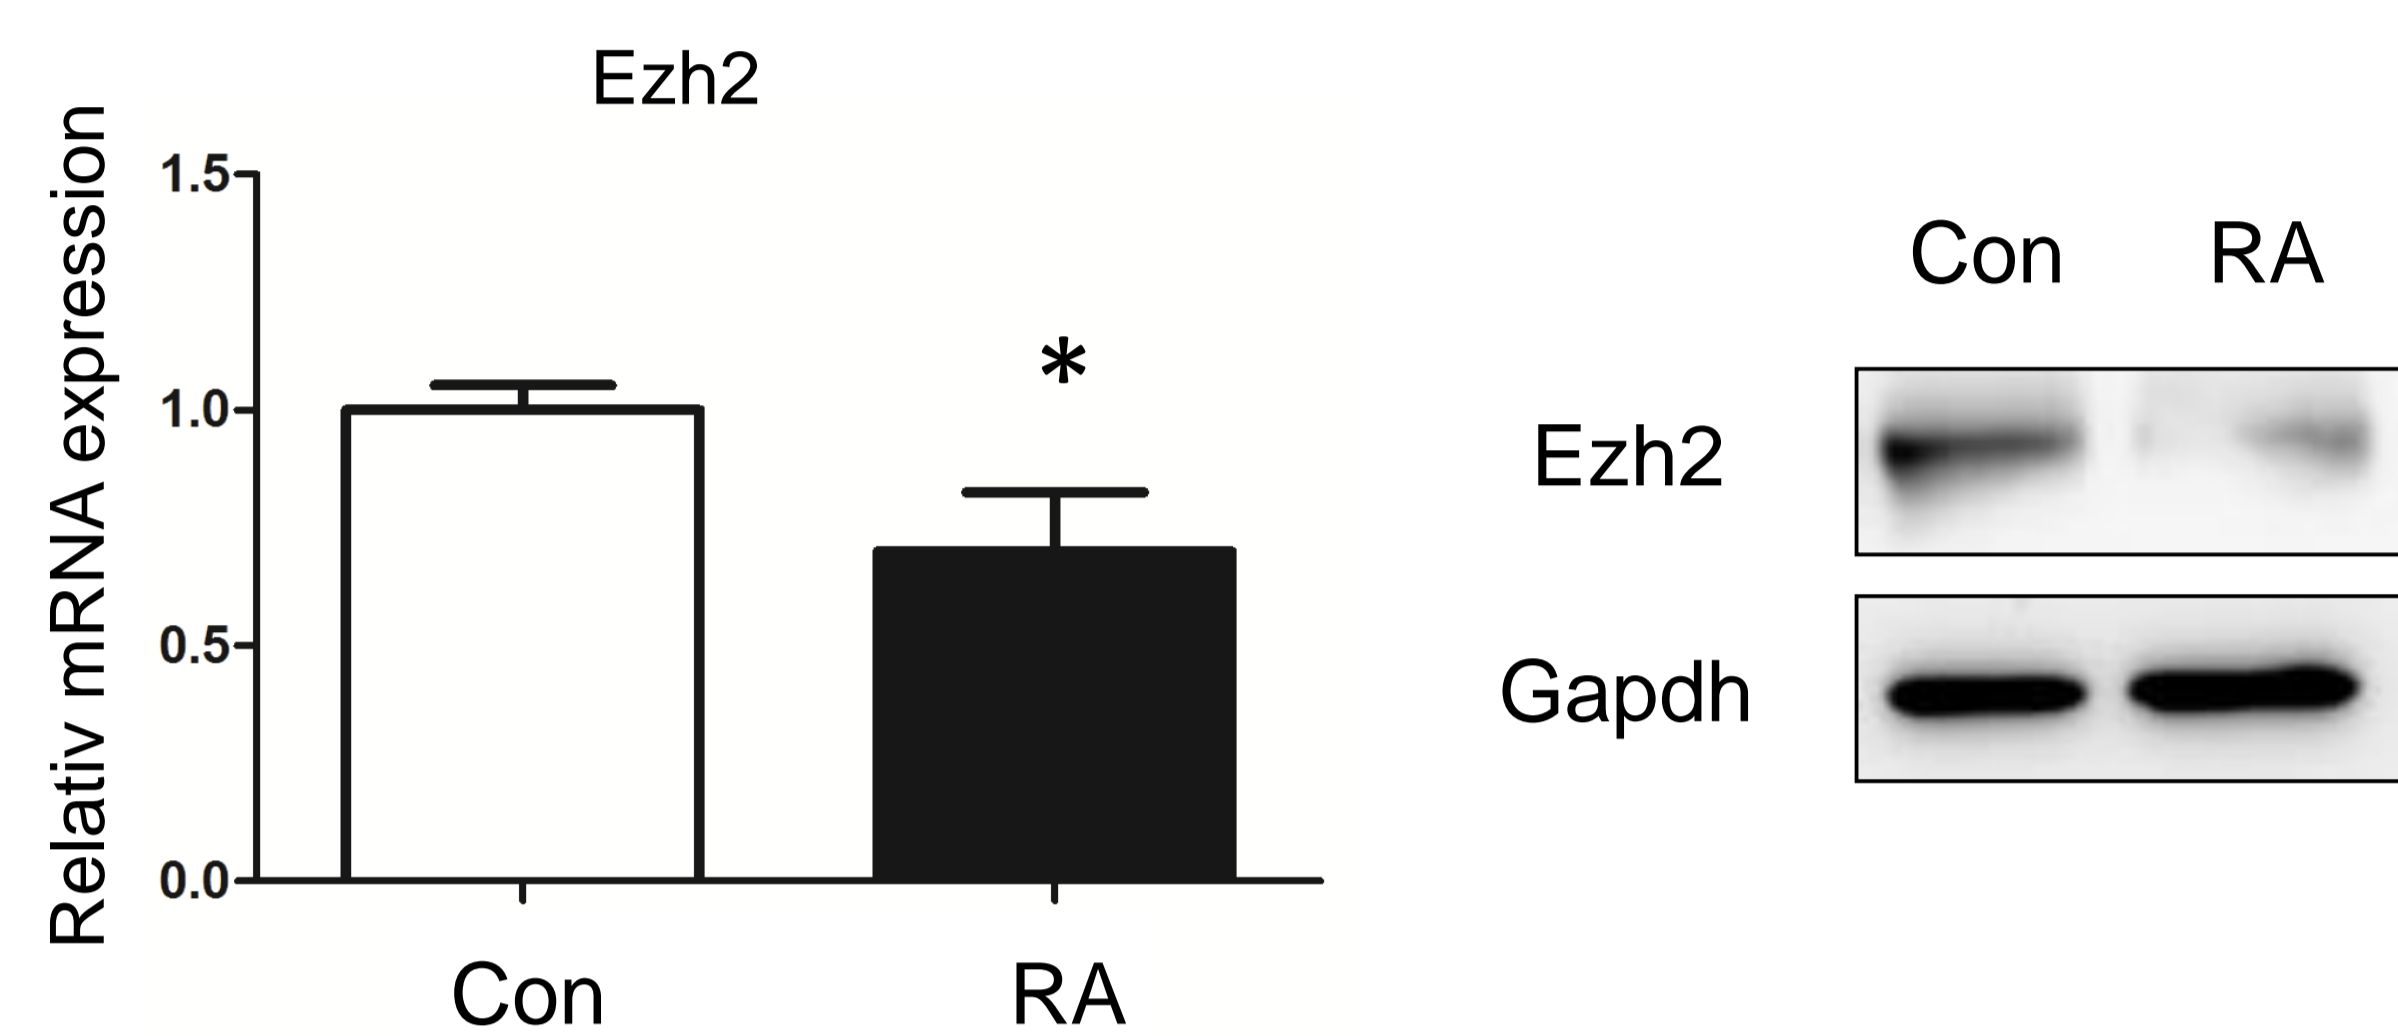**E**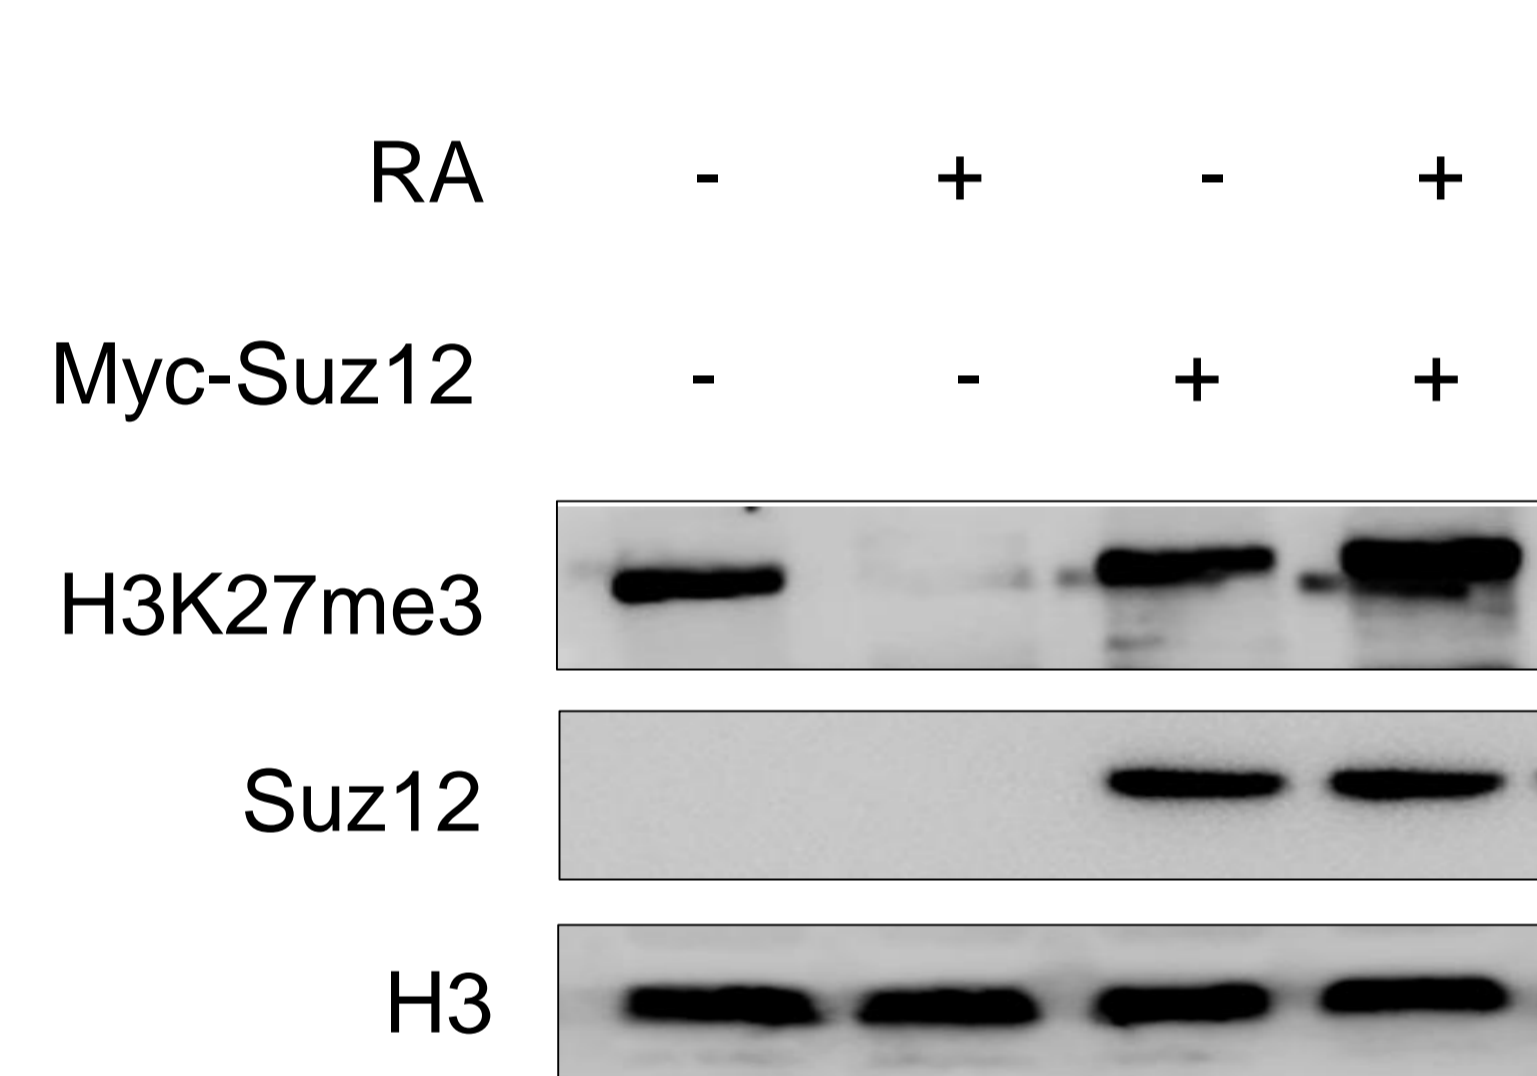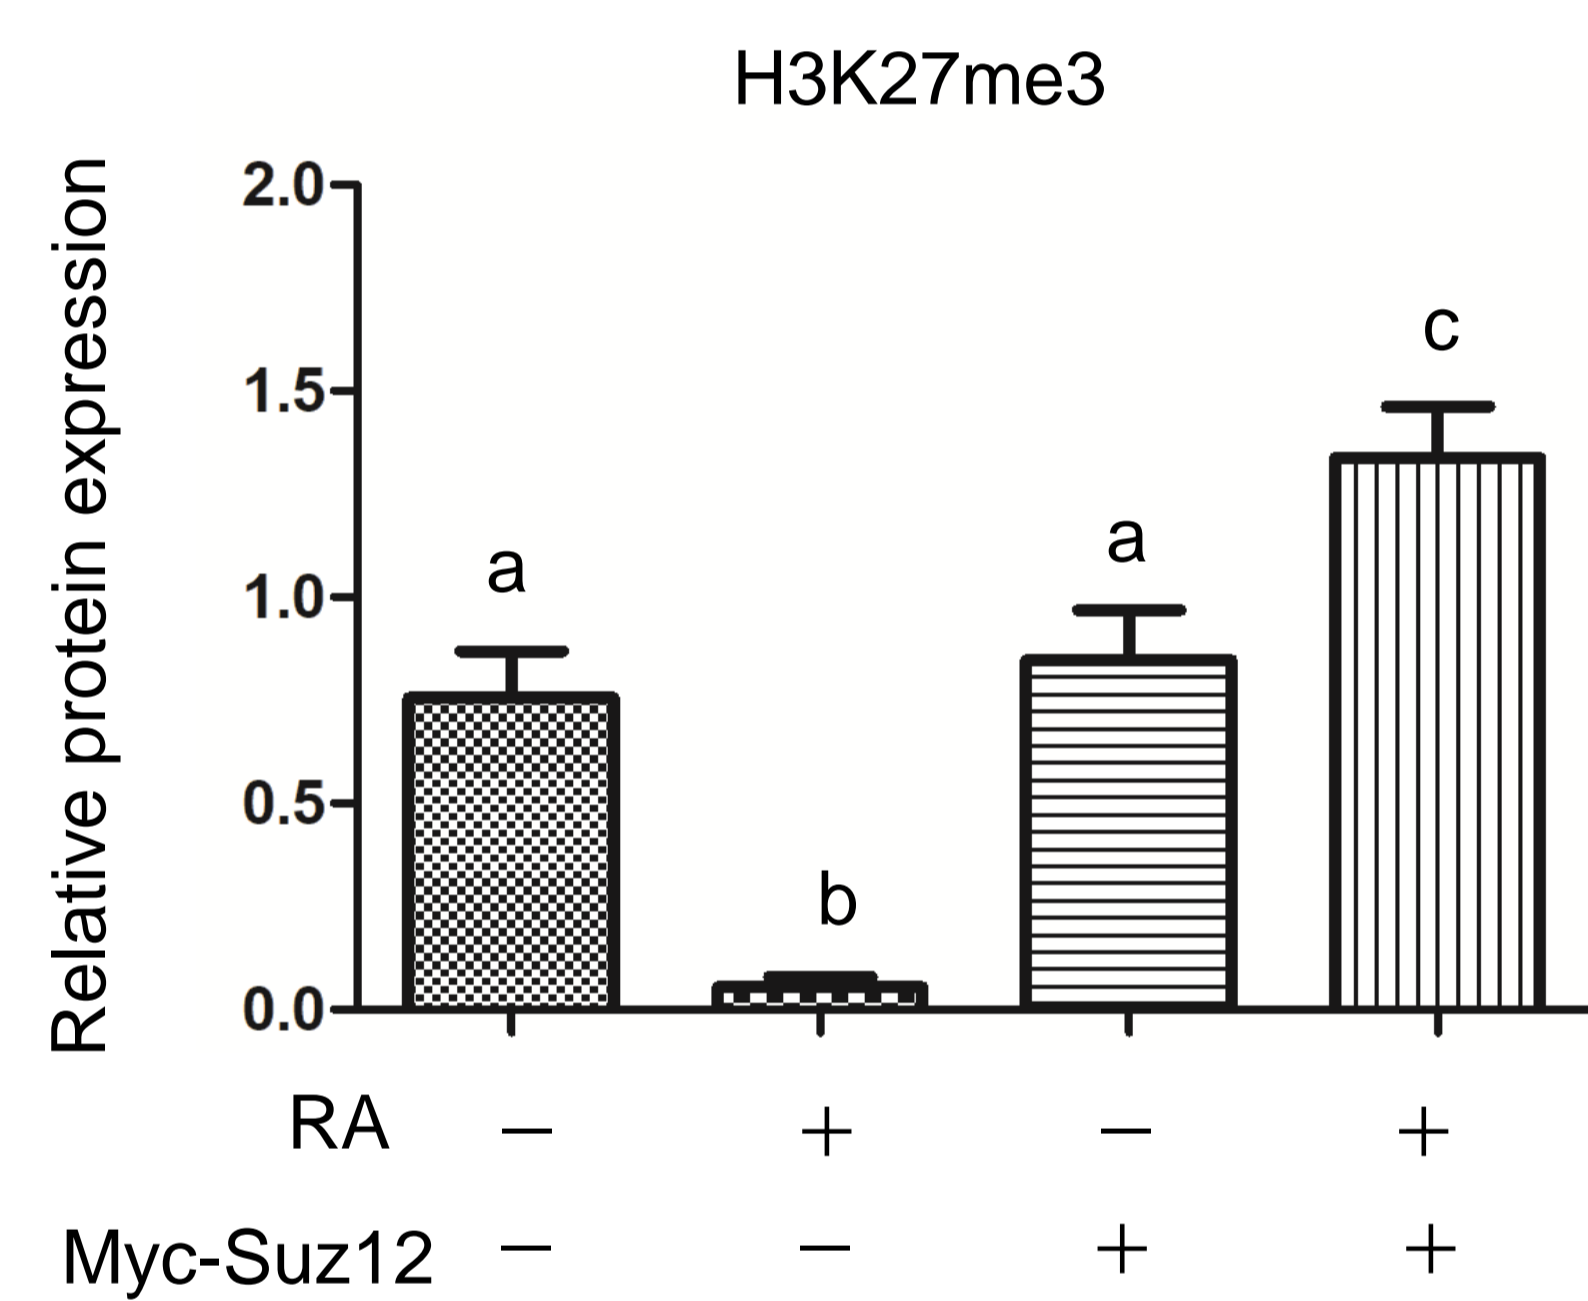

Supplement: 13072_2019_318_MOESM7_ESM.pdf [file 13072_2019_318_MOESM7_ESM.pdf]
